# Supplementary material
Source: Springer Nature journal article supplement (https://www.springermedizin.de/resource/supplementary/13024_2011_351_MOESM5_ESM.pdf/9643756)

**A**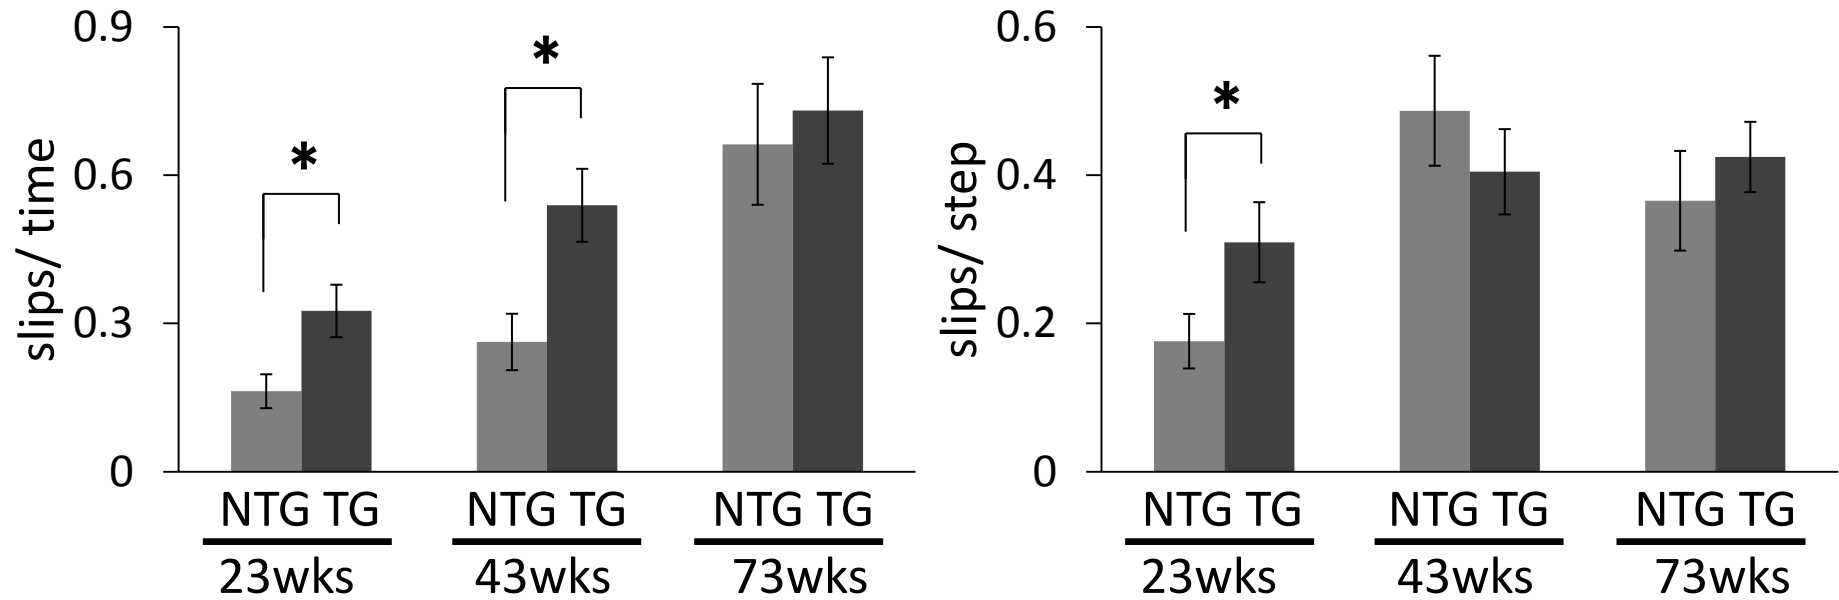**B**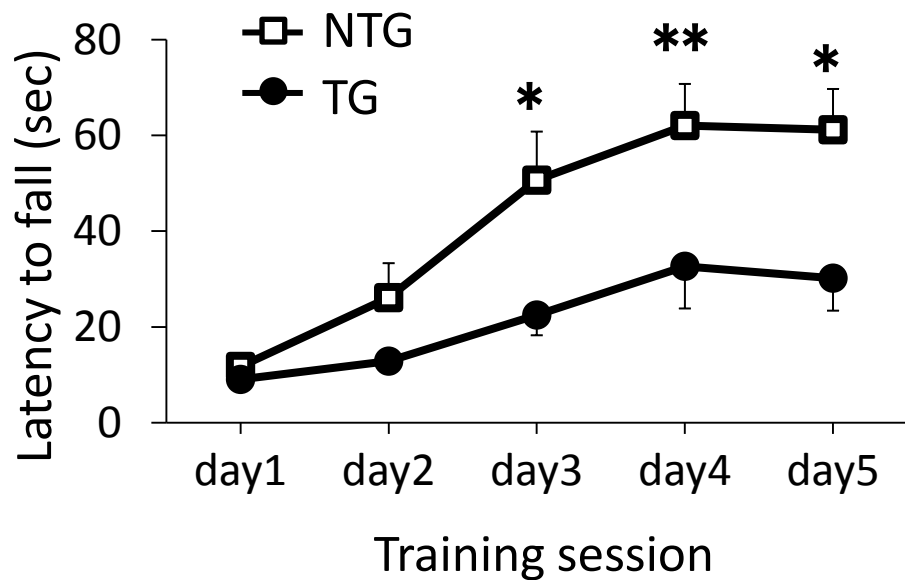**C**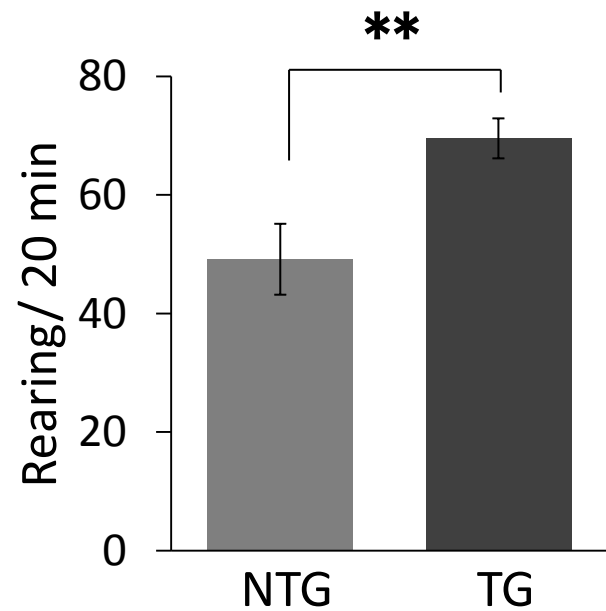

Supplement: MOESM5 [file 9643756]
